# Supplementary material for: Patient-Reported Outcomes of Treatment of Opioid Dependence With Weekly and Monthly Subcutaneous Depot vs Daily Sublingual Buprenorphine: A Randomized Clinical Trial
Source: PubMed Central journal article supplement — JAMA Netw Open. 2021 May 10;4(5):e219041. doi: 10.1001/jamanetworkopen.2021.9041 (PMC8111483; doi:10.1001/jamanetworkopen.2021.9041), 2021-05-10
Supplement: jamanetwopen-e219041-s002.pdf [file jamanetwopen-e219041-s002.pdf]

## Data Sharing Statement

Lintzeris. Patient-Reported Outcomes of Treatment of Opioid Dependence With Weekly and Monthly Subcutaneous Depot vs Daily Sublingual Buprenorphine. *JAMA Netw Open*. Published May 10, 2021. doi:10.1001/jamanetworkopen.2021.9041

### Data

**Data available:** No

### Additional Information

**Explanation for why data not available:** The authors will not make data collected for the study available to others, including individual participant data and a data dictionary defining each field in the set. The final clinical trial protocol is available as a supplement to this publication.
